# Supplementary figures and images for: Obstructive sleep apnea, prediabetes and progression of type 2 diabetes: A systematic review and meta‐analysis
Source: PubMed Central journal article supplement — J Diabetes Investig. 2022 Apr 14;13(8):1396–411. doi: 10.1111/jdi.13793 (PMC9340883; doi:10.1111/jdi.13793), 2022-04-14

Funnel plot with pseudo 95% confidence limits

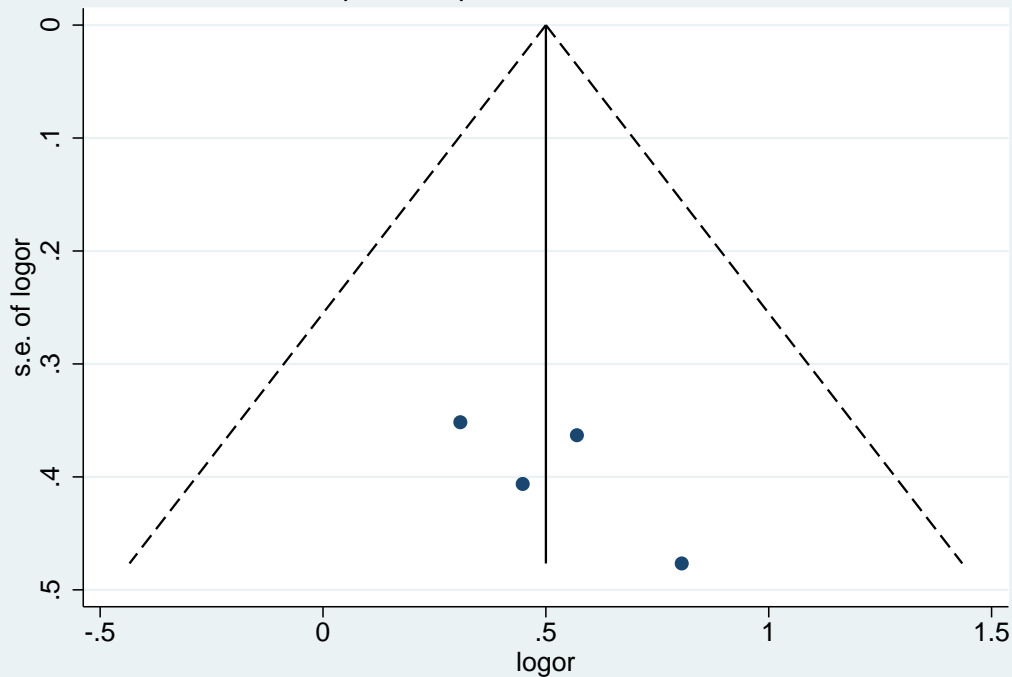

Supplement: JDI-13-1396-s001.pdf [file JDI-13-1396-s001.pdf]

Egger's publication bias plot

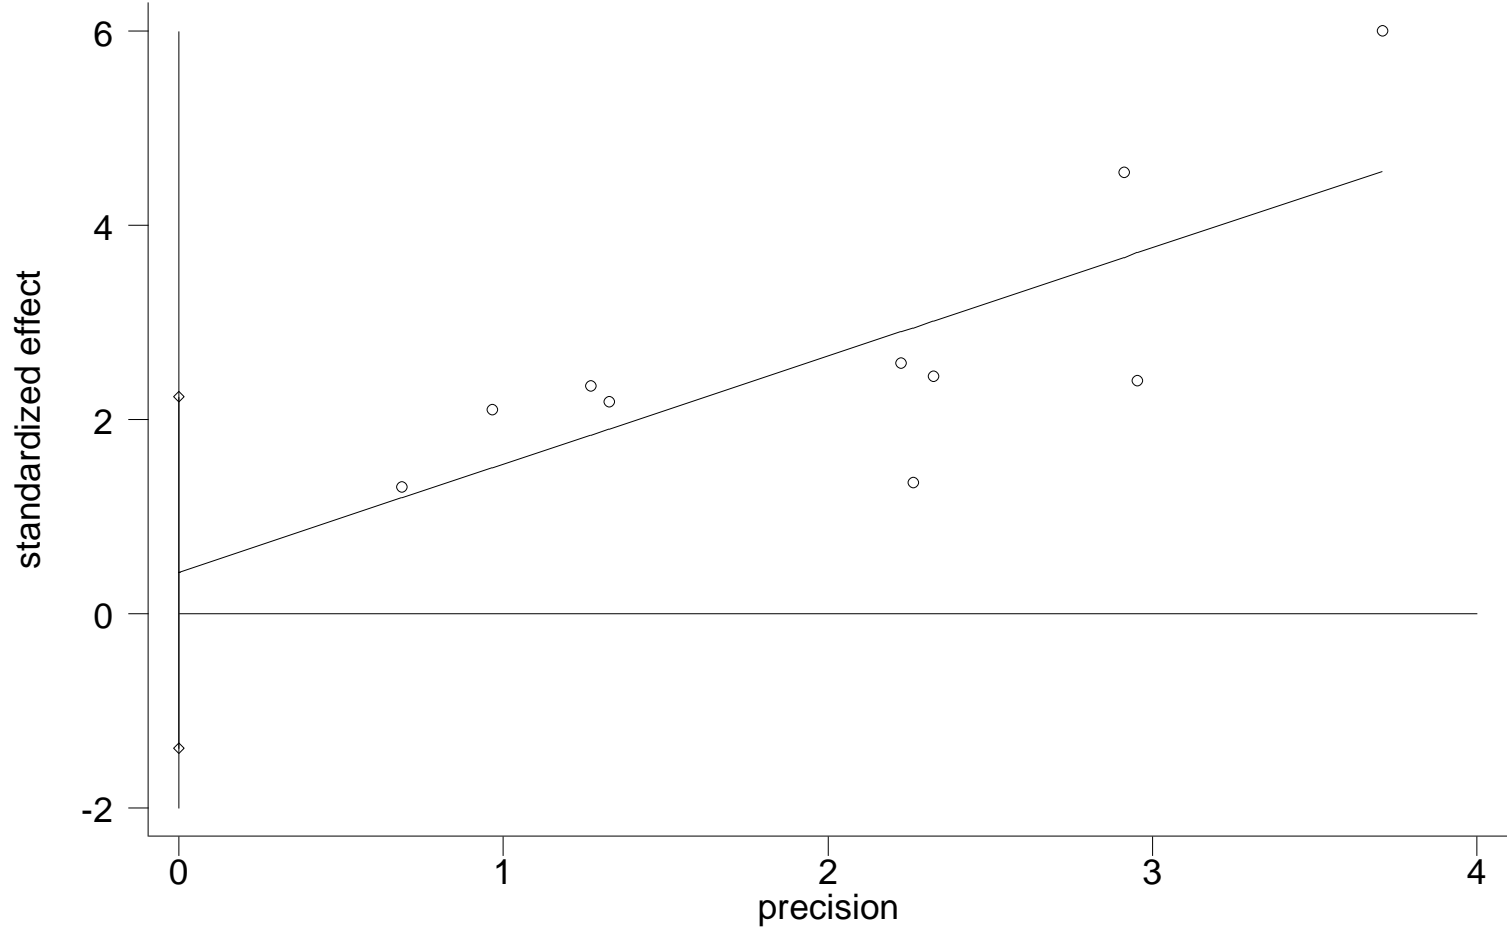

Supplement: JDI-13-1396-s002.pdf [file JDI-13-1396-s002.pdf]

Funnel plot with pseudo 95% confidence limits

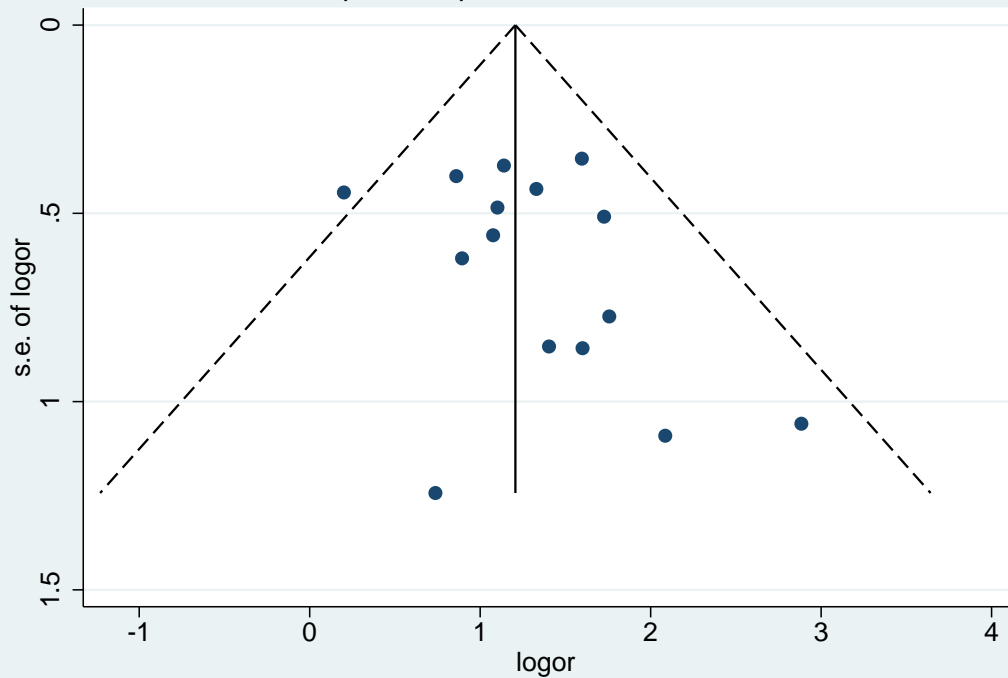

Supplement: JDI-13-1396-s003.pdf [file JDI-13-1396-s003.pdf]

Egger's publication bias plot

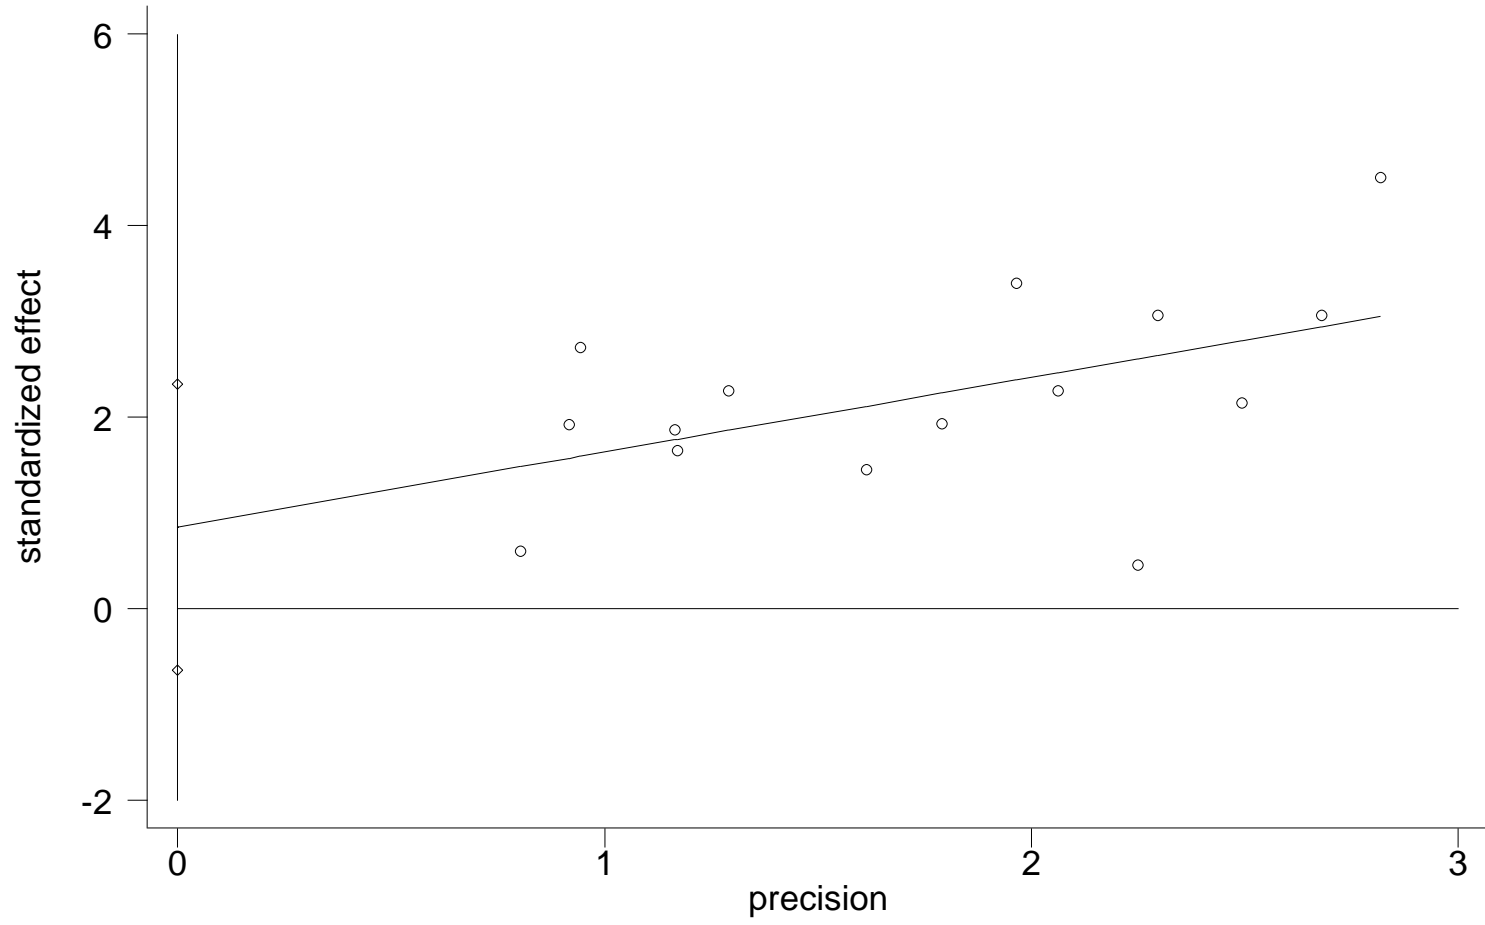

Supplement: JDI-13-1396-s004.pdf [file JDI-13-1396-s004.pdf]

Egger's publication bias plot

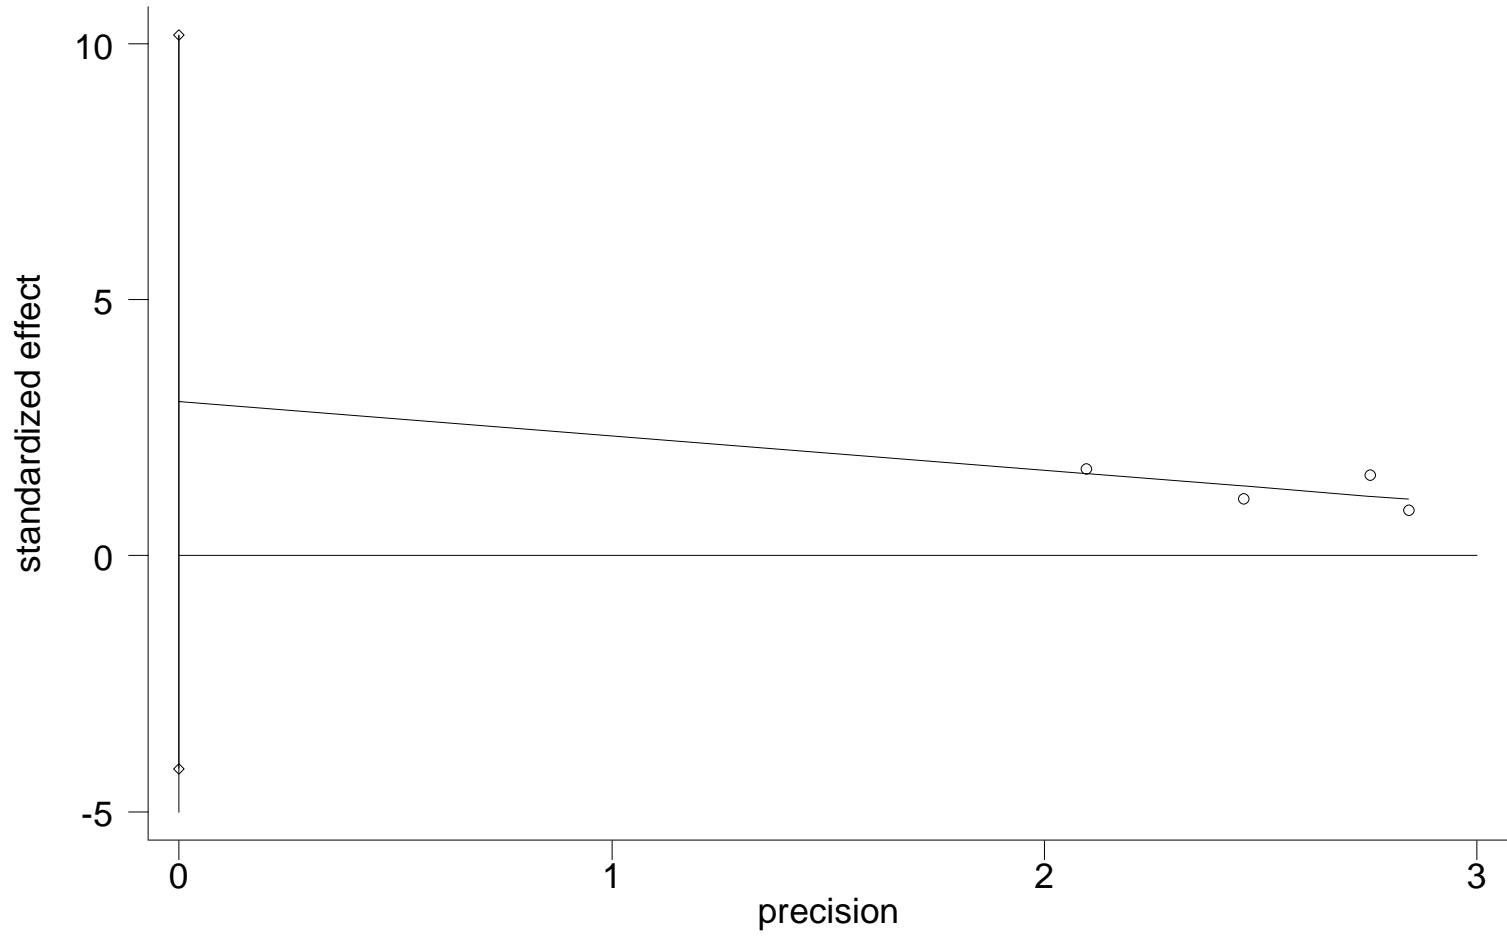

Supplement: JDI-13-1396-s005.pdf [file JDI-13-1396-s005.pdf]

Funnel plot with pseudo 95% confidence limits

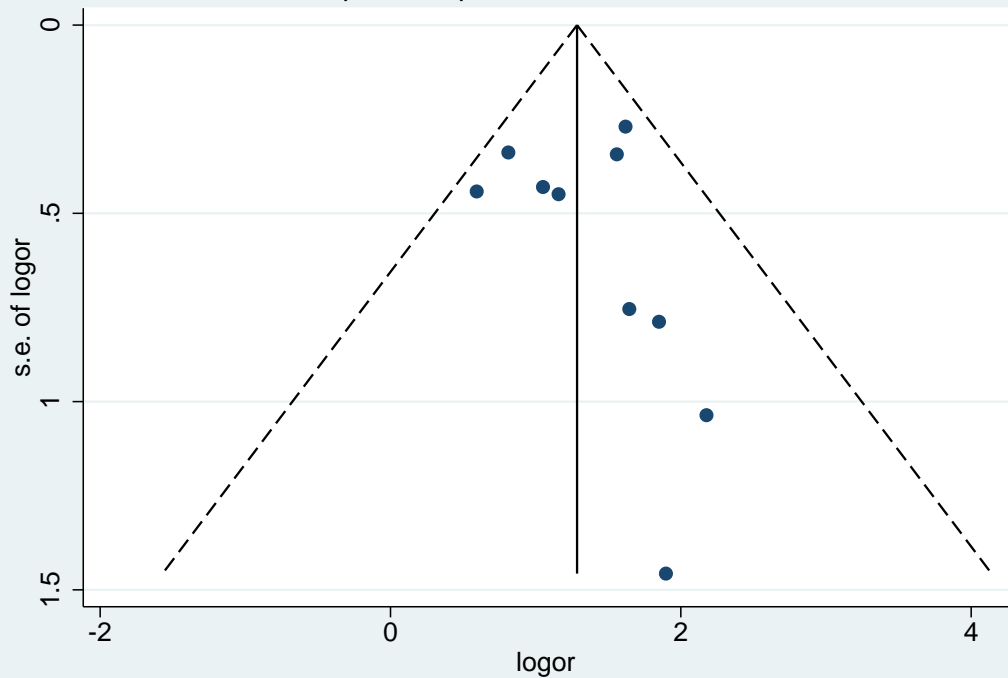

Supplement: JDI-13-1396-s006.pdf [file JDI-13-1396-s006.pdf]

Egger's publication bias plot

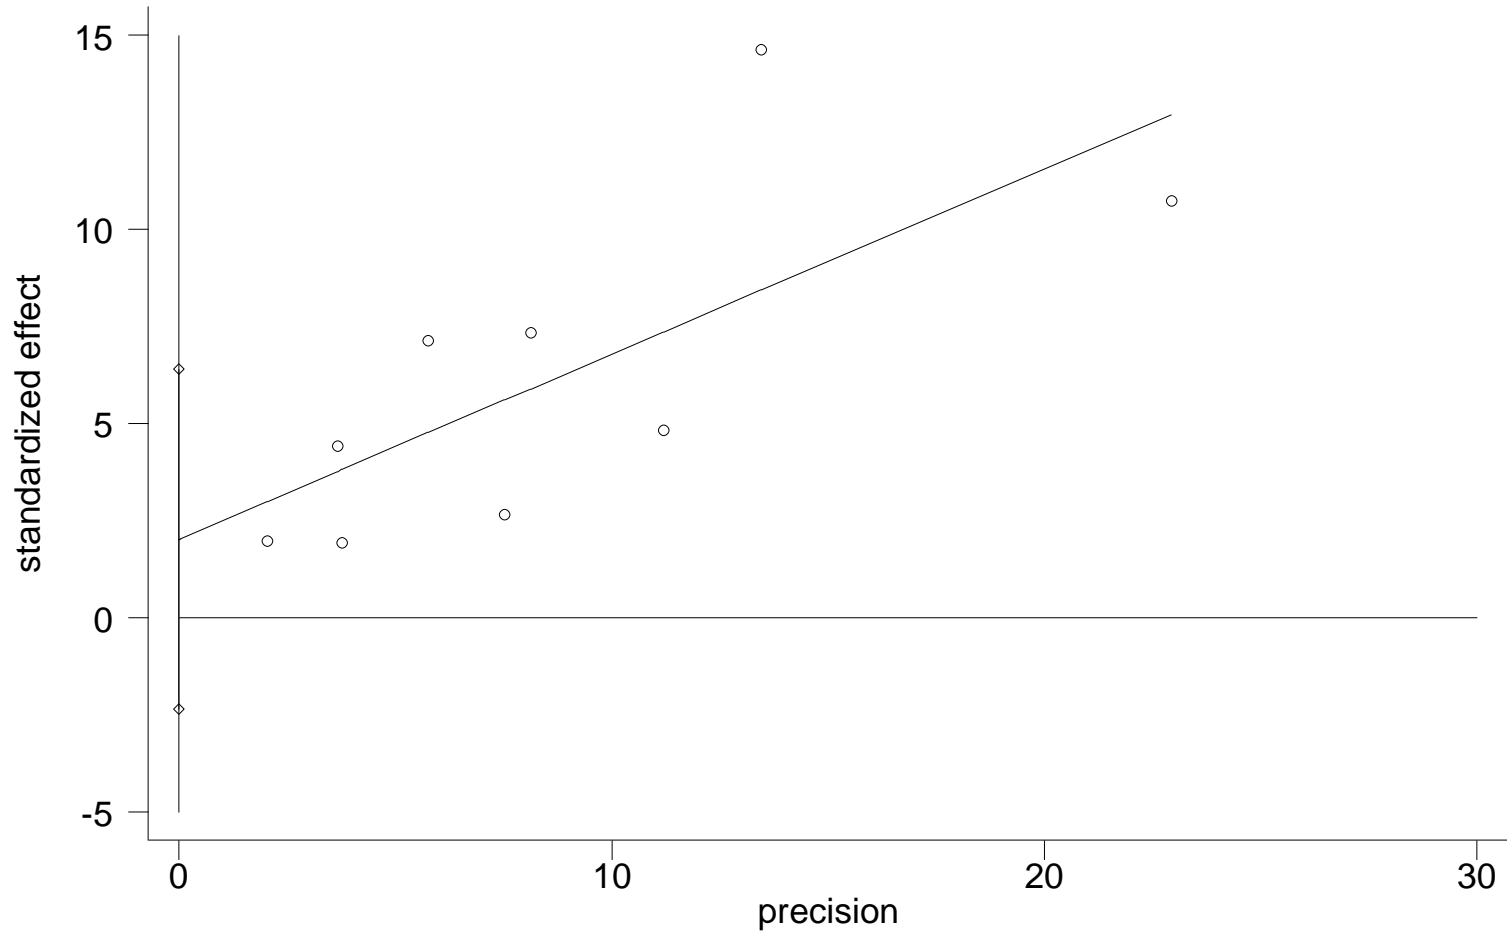

Supplement: JDI-13-1396-s007.pdf [file JDI-13-1396-s007.pdf]

Egger's publication bias plot

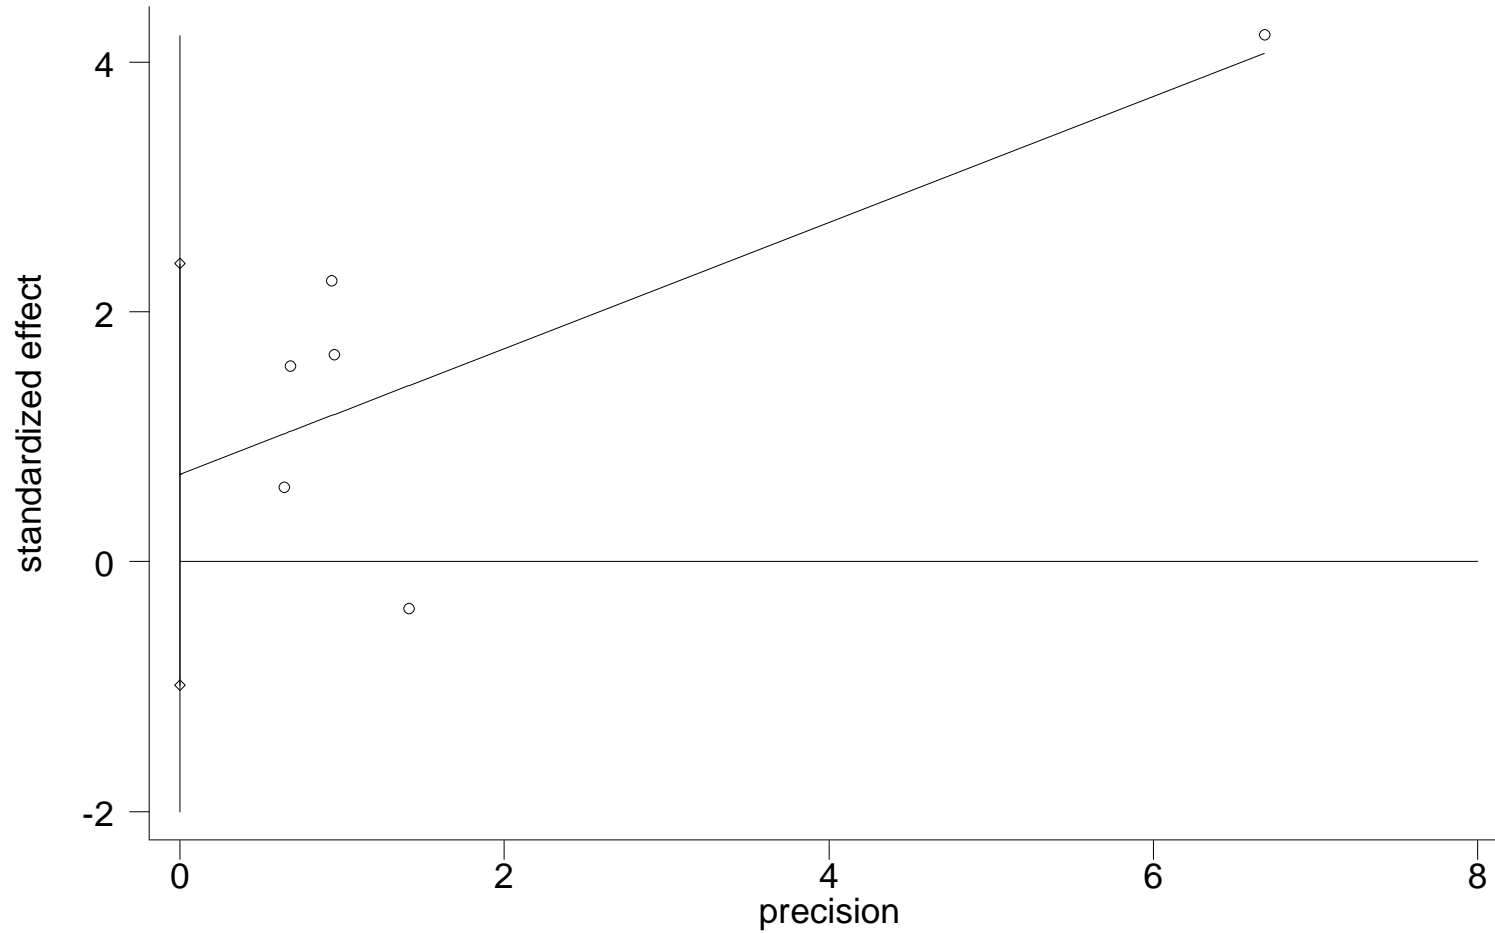

Supplement: JDI-13-1396-s008.pdf [file JDI-13-1396-s008.pdf]

Funnel plot with pseudo 95% confidence limits

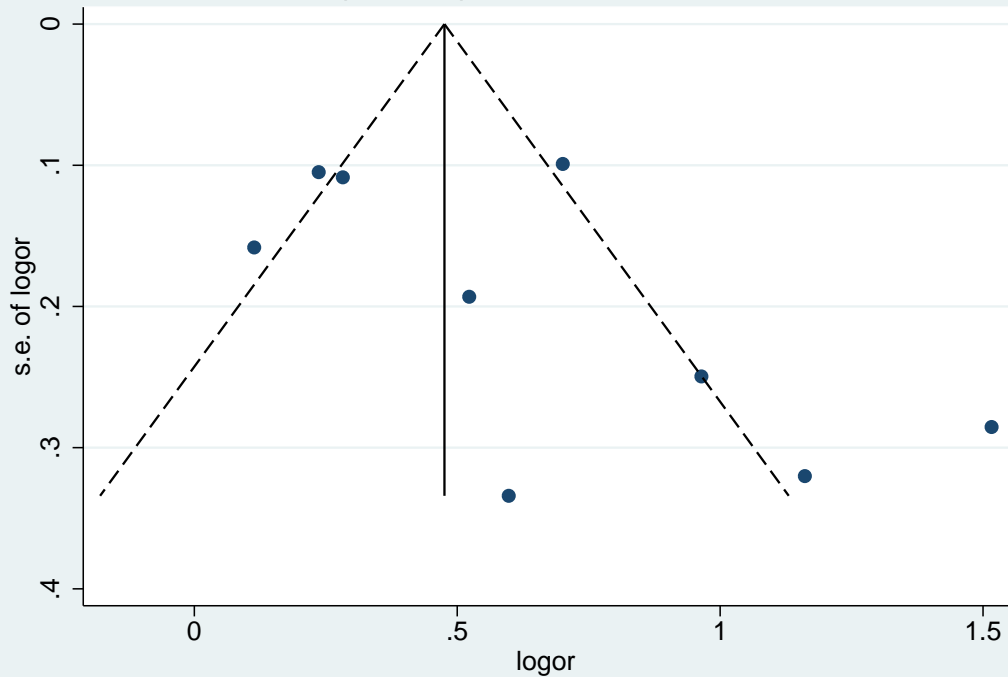

Supplement: JDI-13-1396-s009.pdf [file JDI-13-1396-s009.pdf]

Funnel plot with pseudo 95% confidence limits

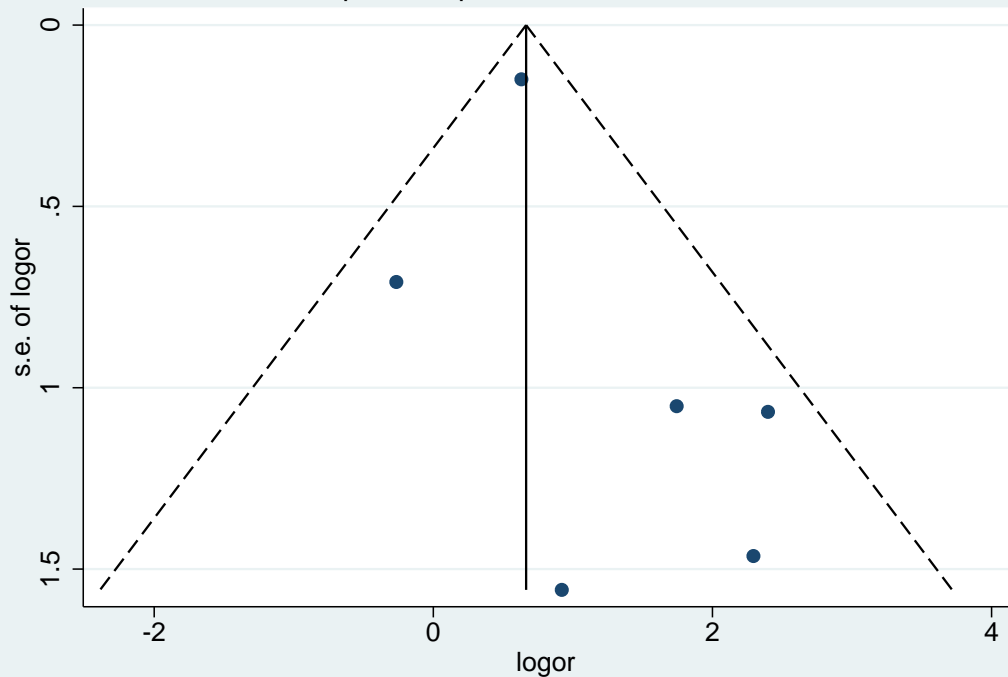

Supplement: JDI-13-1396-s010.pdf [file JDI-13-1396-s010.pdf]

Funnel plot with pseudo 95% confidence limits

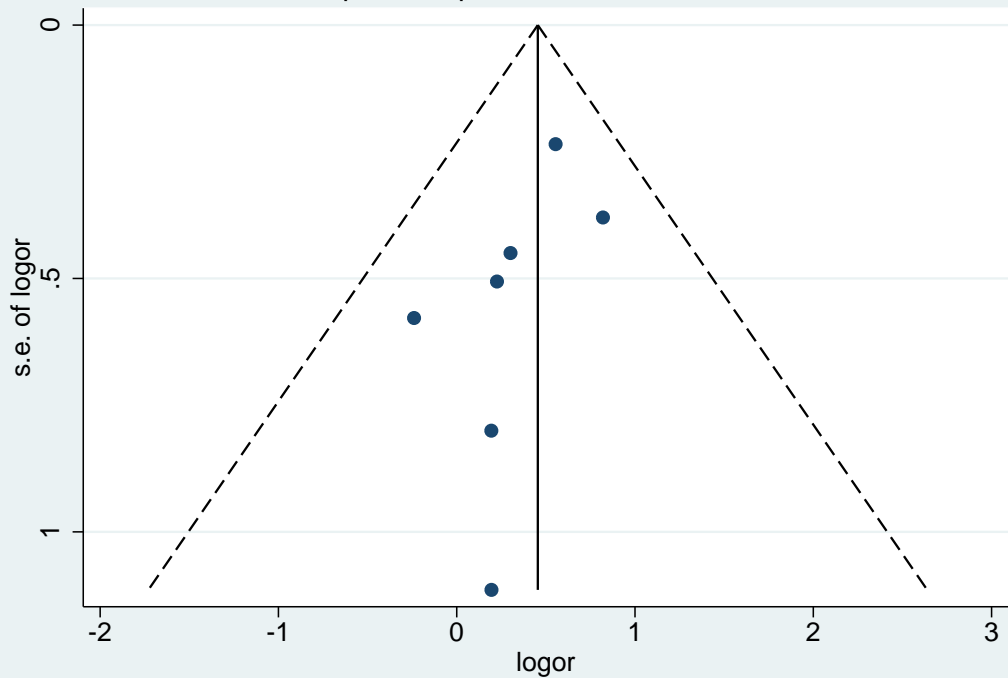

Supplement: JDI-13-1396-s011.pdf [file JDI-13-1396-s011.pdf]

Egger's publication bias plot

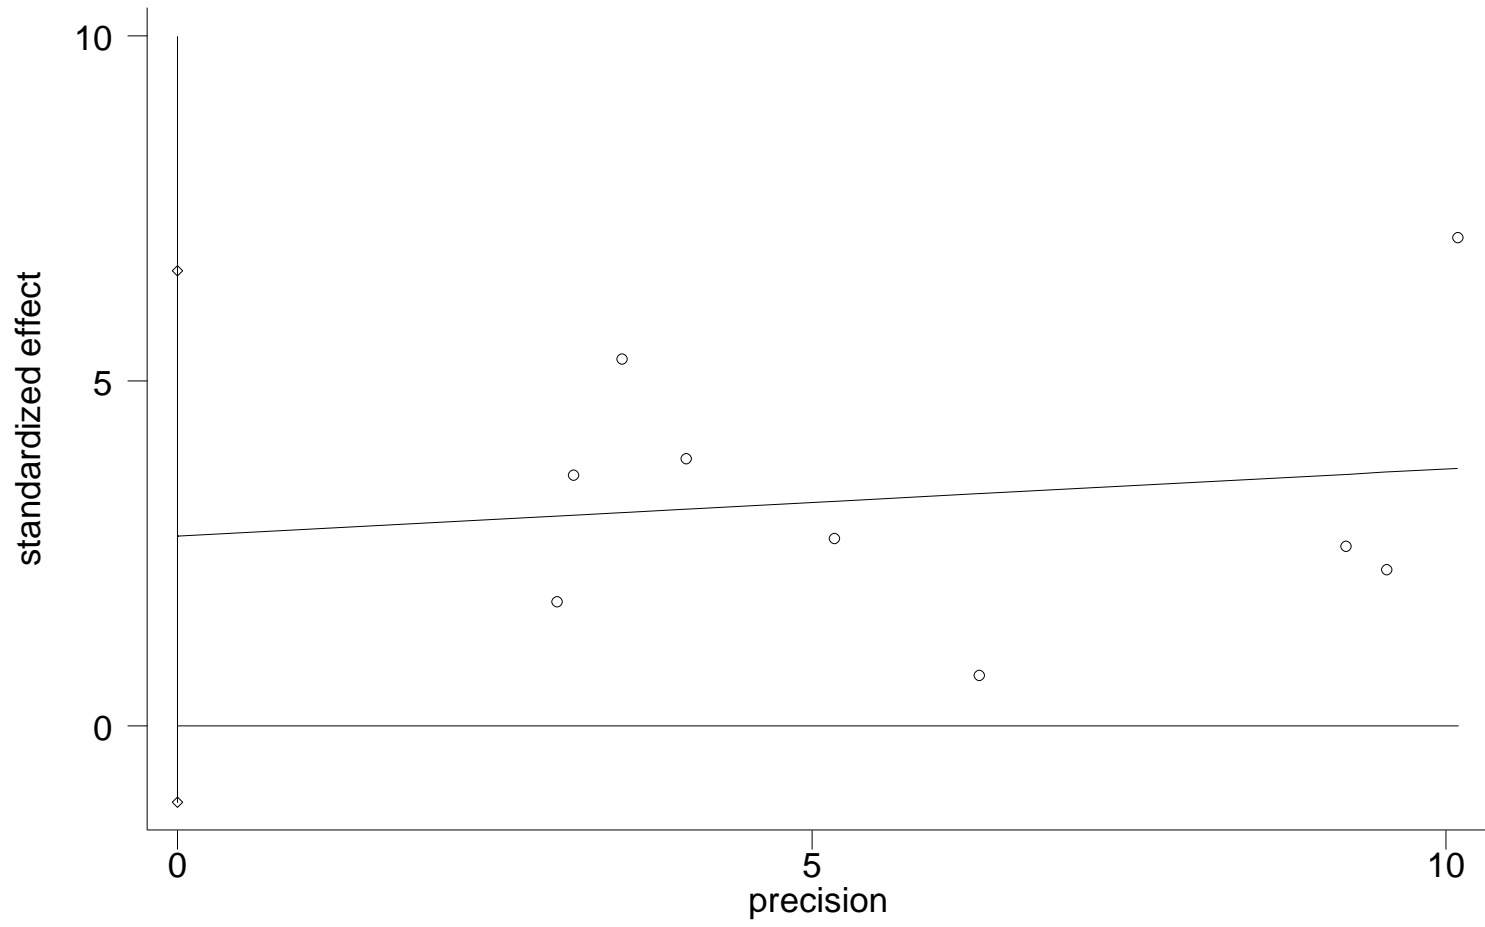

Supplement: JDI-13-1396-s012.pdf [file JDI-13-1396-s012.pdf]

Funnel plot with pseudo 95% confidence limits

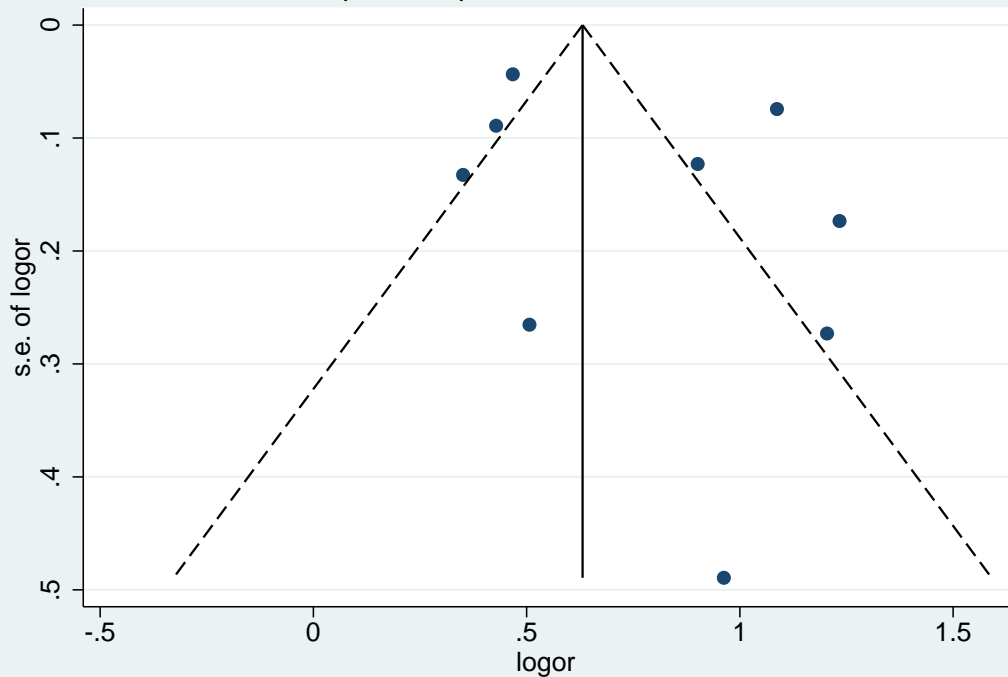

Supplement: JDI-13-1396-s013.pdf [file JDI-13-1396-s013.pdf]

Egger's publication bias plot

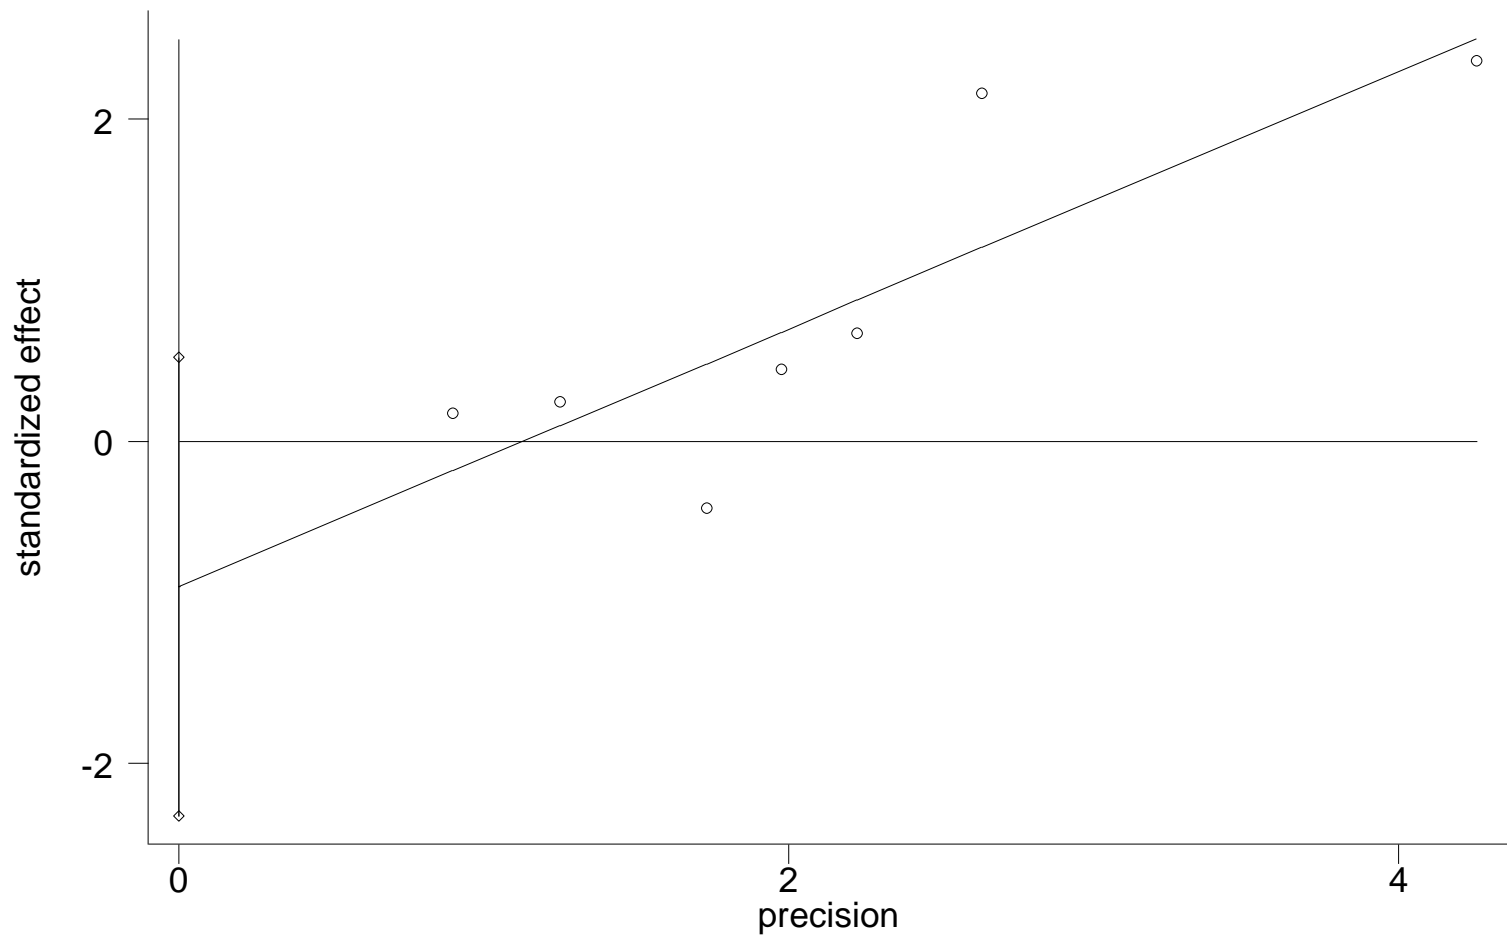

Supplement: JDI-13-1396-s015.pdf [file JDI-13-1396-s015.pdf]
